# Supplementary material
Source: publisher site journal article supplement (https://www.dovepress.com/article/96107)
Supplement: Supplementary file 1 [file get_supplementary_file.php]

Database: Embase <1980 to 2014 Week 09>, Ovid MEDLINE(R) In-Process & Other Non-Indexed Citations, Ovid MEDLINE(R) Daily and Ovid MEDLINE(R) <1946 to Present>

Search Strategy:

- 
- 1 Coronary Artery Bypass Surgery/ or Off Pump Coronary Surgery/ or Coronary Artery Bypass Graft/ (108228)
  - 2 (cab or cabg or acbg).ti,ab. (36812)
  - 3 ((coronar\* or aortocoronar\* or aorto coronar\* or heart or myocardial\* or cardia\*) adj5 bypass\*).ti,ab. (101315)
  - 4 1 or 2 or 3 (150685)
  - 5 \*Mediastinitis/ (4064)
  - 6 \*Sternum/ (7400)
  - 7 \*Surgical Infection/ (11939)
  - 8 5 or (6 and 7) (4176)
  - 9 exp risk/ or risk factor/ or exp mortality/ or exp morbidity/ (3267921)
  - 10 4 and 8 and 9 (159)
  - 11 limit 10 to (danish or english or french or german or norwegian or swedish) (153)
  - 12 11 use emez (95)
  - 13 Coronary Artery Bypass/ or Coronary Artery Bypass, Off-Pump/ or Internal Mammary-Coronary Artery Anastomosis/ (116462)
  - 14 ((coronar\* or aortocoronar\* or aorto coronar\* or heart or myocardial\* or cardia\*) adj5 bypass\*).ti,ab. (101315)
  - 15 (cab or cabg or acbg).ti,ab. (36812)
  - 16 Mediastinitis/ (6726)
  - 17 (mediastinitis or (mediastin\* adj3 (inflamm\* or infect\*))).ti,ab. (7457)
  - 18 Sternum/ (15234)
  - 19 Surgical Wound Infection/ (54287)
  - 20 (vascular adj3 patenc\*).ti,ab. (1380)
  - 21 13 or 14 or 15 (161828)
  - 22 16 or 17 or (18 and 19) (10263)
  - 23 21 and 22 (1519)
  - 24 risk/ or risk assessment/ or risk factors/ (1837592)
  - 25 mortality.fs. (406477)
  - 26 exp morbidity/ or exp mortality/ (1360447)
  - 27 24 or 25 or 26 (3103535)
  - 28 23 and 27 (714)
  - 29 limit 28 to (danish or english or french or german or norwegian or swedish) (672)
  - 30 29 use pmez (270)
  - 31 12 or 30 (365)
  - 32 remove duplicates from 31 (309)
- \*\*\*\*\*

1.

**Appendix: Summary of included studies**

| First author <sup>reference number</sup> | Pubyear | Cases (n) | Total (n) | Place                | Latitude | Longitude | CABG (%) | Age (mean) | Females (%) | Design | Prospective |
|------------------------------------------|---------|-----------|-----------|----------------------|----------|-----------|----------|------------|-------------|--------|-------------|
| Abboud CS <sup>7</sup>                   | 2004    | 46        | 9136      | Brazil               | 23,55    | -46,63    |          | 58,4       | 24,4        | cohort | 1           |
| Ahmed D <sup>8</sup>                     | 2011    | 1         | 767       | Karachi              | 24,86    | 67,00     | 100,0    |            | 30,7        | cohort | 1           |
| Alserius T <sup>9</sup>                  | 2008    | 16        | 605       | Stocholm, Sweden     | 58,19    | -18,06    | 100,0    | 66,0       | 21,0        | cohort | 1           |
| Antunes PE <sup>10</sup>                 | 1997    | 60        | 2512      | Coimbra, Portugal    | 40,20    | -8,41     |          | 56,9       | 45,0        | cohort | 0           |
| Ariyaratnam P <sup>11</sup>              | 2010    | 44        | 7420      | York, England        | 53,95    | -1,09     | 85,5     |            | 22,7        | cohort | 1           |
| Barros deOlivia Sá MP <sup>12</sup>      | 2011    | 28        | 500       | Recif, Brazil        | 8,04     | -34,87    | 100,0    | 62,1       | 1,6         | cohort | 0           |
| Baskett RJ <sup>13</sup>                 | 1999    | 24        | 9771      | Nova Scotia, Canada  | 44,68    | -63,74    |          | 64,2       | 14,3        | cohort | 0           |
| Bitkover CY <sup>14</sup>                | 1998    | 40        | 1935      | Sweden               | 58,19    | 18,06     |          | 64,2       |             | cohort | 1           |
| Blanchard A <sup>15</sup>                | 1995    | 6         | 4137      | Lausanne             | 46,51    | 6,63      | 68,2     | 57,4       | 18,4        | cohort | 0           |
| Borger MA <sup>16</sup>                  | 1998    | 92        | 12267     | Torento, Canada      | 43,05    | -79,38    |          |            | 27,9        | cohort | 0           |
| Braxton JH <sup>17</sup>                 | 2004    | 418       | 36078     | Portland, Maryland   | 34,06    | 18,61     |          | 65,4       | 28,4        | cohort | 0           |
| Breyer RH <sup>18</sup>                  | 1984    | 7         | 870       | Winston Salem, NC    | 36,09    | -80,24    | 78,0     | 54,1       | 27,0        | cohort | 1           |
| Cayci C <sup>19</sup>                    | 2008    | 123       | 7978      | New York             | 40,71    | -74,00    |          | 62,9       | 32,8        | cohort | 1           |
| Centofanti P <sup>20</sup>               | 2007    | 7         | 493       | Turin, Italy         | 45,07    | 7,68      |          | 66,1       | 30,2        | cohort | 1           |
| Culliford AT <sup>21</sup>               | 1976    | 39        | 2594      | New York             | 40,71    | -74,00    |          |            |             | cohort | 0           |
| Danzer D <sup>22</sup>                   | 2001    | 2         | 694       | Geneva, Swiss        | 46,19    | 6,14      | 100,0    | 58,6       | 10,8        | cohort | 0           |
| De Feo M <sup>23</sup>                   | 2001    | 112       | 13420     | Napoli               | 40,85    | 14,26     |          |            |             | cohort | 1           |
| De Moraes AA <sup>24</sup>               | 2012    | 144       | 1975      | Sao Paulo            | 23,55    | -46,63    | 100,0    |            |             | cohort | 0           |
| Demmy T <sup>25</sup>                    | 1990    | 31        | 1525      | Pittesburg, USA      | 40,44    | -79,99    |          | 63,6       | 33,0        | cohort | 1           |
| Diez C <sup>26</sup>                     | 2007    | 45        | 1700      | Hall/Saale, Germany  | 51,41    | 11,96     | 84,5     | 64,1       | 28,6        | cohort | 0           |
| Eklund AM <sup>27</sup>                  | 2006    | 120       | 10000     | Helsinki, Finland    | 60,17    | 24,94     | 85,4     | 62,5       | 29,0        | cohort | 1           |
| Elenbass TW <sup>28</sup>                | 2010    | 100       | 11748     | Ghent, Belgium       | 51,04    | 11,96     | 100,0    | 64,7       | 23,0        | cohort | 0           |
| Engelman RM <sup>29</sup>                | 1973    | 17        | 1042      | New York             | 40,71    | -74,00    | 34,5     |            |             | cohort | 0           |
| Fakih MG <sup>30</sup>                   | 2007    | 70        | 3578      | Detroit, Michigan    | 42,33    | -83,04    | 83,4     |            |             | cohort | 1           |
| Farsky PS <sup>31</sup>                  | 2011    | 143       | 1975      | Sao Paulo, Brazil    | 23,55    | -46,63    | 100,0    | 62,4       | 30,3        | cohort | 1           |
| Filsoufi F <sup>32</sup>                 | 2007    | 106       | 5798      | New York             | 40,71    | -74,00    | 47,4     | 64,0       | 62,0        | cohort | 0           |
| Fowler VG <sup>33</sup>                  | 2005    | 2921      | 331429    | all USA              |          |           |          |            | 29,5        | cohort | 0           |
| Garey KW <sup>34</sup>                   | 2006    | 128       | 2590      | Houston, Texas       | 29,76    | -95,38    | 66,0     | 65,0       | 33,0        | cohort | 1           |
| Gaynes R <sup>35</sup>                   | 1991    | 20        | 1120      | Ann Harbor, Michigan | 44,31    | -85,60    | 100,0    | 60,6       | 21,0        | cohort | 0           |
| Ghotaslou R <sup>36</sup>                | 2008    | 23        | 1827      | Tabriz, Iran         | 35,70    | 51,40     | 70,0     | 59,0       |             | cohort | 0           |
| Grmoljez PF <sup>37</sup>                | 1975    | 10        | 1500      | St Lous, Missouri    | 38,62    | -90,19    | 38,6     |            |             | cohort | 0           |
| Grossi EA <sup>38</sup>                  | 1985    | 77        | 7949      | New York             | 40,71    | -74,00    | 47,0     | 57,8       | 43,0        | cohort | 1           |
| Grossi EA <sup>39</sup>                  | 1991    | 39        | 2356      | New York             | 40,71    | -74,00    | 100,0    | 62,8       | 7,4         | cohort | 1           |
| Gwely NDN <sup>40</sup>                  | 2001    | 28        | 600       | Mansoura, Egypt      | 31,04    | 31,37     | 95,3     |            | 60,7        | cohort | 1           |
| Gårdlund B <sup>41</sup>                 | 2002    | 126       | 9557      | Stocholm, Sweden     | 58,19    | 18,06     |          |            |             | cohort | 1           |
| Harrington G <sup>42</sup>               | 2004    | 349       | 4474      | Victoria, Australia  | 37,47    | 144,78    |          | 65,2       | 24,0        | cohort | 1           |
| Hassan M <sup>43</sup>                   | 2006    | 89        | 7889      | Cincinnati, Ohio     | 39,10    | -85,41    | 100,0    | 57,3       |             | cohort | 1           |

| First author <sup>reference number</sup> | Pubyear | Cases (n) | Total (n) | Place                     | Latitude | Longitude | CABG (%) | Age (mean) | Females (%) | Design | Prospective |
|------------------------------------------|---------|-----------|-----------|---------------------------|----------|-----------|----------|------------|-------------|--------|-------------|
| Hazelrigg SR <sup>44</sup>               | 1989    | 6         | 2582      | Springfield Illinois      | 39,78    | -89,65    | 100,0    | 60,3       |             | cohort | 0           |
| Hosseinrezaei H <sup>45</sup>            | 2012    | 52        | 520       | Shahrekord, Iran          | 32,32    | 50,86     |          | 57,5       | 32,0        | cohort | 1           |
| Immer FF <sup>46</sup>                   | 2005    | 55        | 5690      | Berne, Swiss              | 46,94    | 7,44      |          | 64,1       | 31,0        | cohort | 0           |
| Ivert T <sup>47</sup>                    | 1991    | 27        | 6323      | Stockholm, Sweden         | 58,19    | 18,06     |          | 63,0       |             | cohort | 0           |
| Jakob HG <sup>48</sup>                   | 2000    | 14        | 376       | Heidelberg, Germany       | 49,38    | 8,67      | 74,7     | 62,6       | 30,8        | cohort | 1           |
| Jiménez-Martínez M <sup>49</sup>         | 1970    | 13        | 257       | Mexico City               | 19,43    | -99,13    |          |            |             | cohort | 1           |
| Jonkers D <sup>50</sup>                  | 2003    | 25        | 1885      | Massterich, Holland       | 50,85    | 5,69      | 75,0     |            | 31,0        | cohort | 1           |
| Jurkewicz MJ <sup>51</sup>               | 1980    | 49        | 3239      | Atlanta, USA              | 33,74    | -84,38    |          |            |             | cohort | 1           |
| Khoo AK <sup>52</sup>                    | 1994    | 13        | 2193      | Singapor                  | 1,28     | 103,83    | 100,0    |            |             | cohort | 0           |
| Kim J <sup>53</sup>                      | 2003    | 53        | 6728      | Stockholm, Sweden         | 58,19    | 18,06     | 100,0    | 57,9       |             | cohort | 0           |
| Kohli M <sup>54</sup>                    | 2003    | 133       | 11508     | Totronto, Canada          | 43,65    | -74,39    | 68,0     | 60,0       | 27,0        | cohort | 1           |
| Kubota H <sup>55</sup>                   | 2013    | 1326      | 73700     | Tokyo                     | 35,68    | 139,69    | 36,6     |            |             | cohort | 1           |
| Lepelletier D <sup>56</sup>              | 2005    | 18        | 1268      | Nantes, France            | 47,21    | -1,55     | 38,7     | 61,0       | 29,0        | cohort | 0           |
| Loop FD <sup>57</sup>                    | 1990    | 72        | 6504      | Cleveland, Ohio           | 41,49    | -81,69    |          | 60,3       | 21,7        | cohort | 1           |
| Lu JC <sup>58</sup>                      | 2003    | 28        | 4228      | Liverpool, UK             | 53,40    | -2,99     | 100,0    | 63,9       | 19,7        | cohort | 1           |
| Macmanus Q <sup>59</sup>                 | 1976    | 9         | 619       | Oregon, Portland          | 45,52    | -122,67   |          | 51,0       |             | cohort | 0           |
| Magedanz EH <sup>60</sup>                | 2010    | 94        | 2809      | Allegre Rio Grande do sul | 28,31    | -52,79    | 100,0    |            |             | cohort | 1           |
| Matros E <sup>61</sup>                   | 2010    | 285       | 21191     | Boston, USA               | 42,35    | 71,59     | 77,0     | 64,8       | 34,0        | cohort | 0           |
| Milano CA <sup>64</sup>                  | 1995    | 83        | 6459      | Durham, USA               | 35,99    | -78,89    |          | 62,0       | 26,0        | cohort | 0           |
| Muñoz P <sup>65</sup>                    | 1997    | 81        | 3711      | Madrid, Spain             | 40,41    | -3,70     | 69,0     | 56,0       | 30,0        | cohort | 0           |
| Nagachinta T <sup>66</sup>               | 1987    | 69        | 1009      | Baltimore, Maryland       | 39,29    | -76,61    | 80,0     |            |             | cohort | 1           |
| Newman LS <sup>67</sup>                  | 1998    | 68        | 9965      | Atlanta                   | 33,74    | -84,38    |          | 56,1       | 15,0        | cohort | 0           |
| Noyez L <sup>68</sup>                    | 2001    | 101       | 3815      | Nijmegen, Netherlands     | 51,81    | 5,83      | 100,0    |            | 22,0        | cohort | 1           |
| Ochsner JL <sup>69</sup>                 | 1972    | 3         | 700       | New orleans               | 29,98    | -90,07    |          |            | 50,0        | cohort | 0           |
| Olsen MA <sup>70</sup>                   | 2002    | 37        | 1980      | St Louis                  | 38,62    | -90,19    | 83,4     | 66,0       | 32,6        | cohort | 0           |
| Orita H <sup>62</sup>                    | 1992    | 41        | 782       | Yamagata, Japan           | 38,25    | 140,23    |          |            |             | cohort | 1           |
| Ottino G <sup>71</sup>                   | 1987    | 48        | 2579      | Torino                    | 45,07    | 7,68      |          |            |             | cohort | 0           |
| Parisian Study <sup>72</sup>             | 1996    | 42        | 1830      | Paris                     | 48,85    | 2,35      | 52,5     |            | 29,8        | cohort | 1           |
| Parissis H <sup>73</sup>                 | 2011    | 52        | 3896      | Belfast, Irland           | 54,61    | -5,90     |          | 63,7       | 22,0        | cohort | 1           |
| Paul M <sup>63</sup>                     | 2007    | 29        | 809       | Tel Aviv                  | 32,08    | 34,78     | 85,0     | 65,6       | 21,5        | cohort | 1           |
| Popovic B <sup>74</sup>                  | 2013    | 93        | 4210      | Nancy, France             | 48,69    | 6,18      | 100,0    | 64,5       | 33,3        | cohort | 0           |
| Prabhakar G <sup>75</sup>                | 2002    | 3333      | 559004    | all USA                   |          |           |          | 64,8       | 29,4        | cohort | 0           |
| Rahmanian PB <sup>76</sup>               | 2010    | 111       | 6641      | Cologne, Germany          | 50,93    | 6,90      | 43,0     | 64,0       | 38,0        | cohort | 0           |
| Reyna GC <sup>77</sup>                   | 2006    | 27        | 7862      | Mexico                    | 19,43    | -99,13    | 43,7     | 58,1       |             | cohort | 0           |
| Ridderstolpe L <sup>78</sup>             | 2001    | 47        | 3008      | Linkoping, Sweden         | 58,41    | 16,52     | 70,0     | 65,4       | 27,7        | cohort | 0           |
| Risnes I <sup>1</sup>                    | 2010    | 107       | 18532     | Oslo, Norway              | 59,91    | 10,78     |          | 62,4       | 24,3        | cohort | 0           |
| Russo PL <sup>79</sup>                   | 2005    | 21        | 3398      | Victoria, Australia       | 37,47    | 144,78    |          | 66,0       | 28,0        | cohort | 1           |
| Sachithanandan A <sup>80</sup>           | 2008    | 76        | 4586      | Birmingham, UK            | 52,48    | -1,89     | 63,6     | 64,3       | 26,1        | cohort | 1           |
| Sakamoto H <sup>81</sup>                 | 2003    | 17        | 863       | Hirosaki,Aomori, Japan    | 40,60    | 140,46    | 61,6     | 61,2       | 3,5         | cohort | 0           |

| First author <sup>reference number</sup> | Pubyear | Cases (n) | Total (n) | Place                  | Latitude | Longitude | CABG (%) | Age (mean) | Females (%) | Design | Prospective |
|------------------------------------------|---------|-----------|-----------|------------------------|----------|-----------|----------|------------|-------------|--------|-------------|
| Salehi OA <sup>82</sup>                  | 2007    | 21        | 9201      | Teheran                | 36,69    | 51,42     |          | 58,5       | 25,5        | cohort | 1           |
| Sang LWS <sup>83</sup>                   | 2013    | 108       | 6653      | Montreal, Canada       | 45,50    | -73,55    | 64,9     | 66,0       | 30,0        | cohort | 0           |
| Serry C <sup>84</sup>                    | 1980    | 38        | 4124      | Chicago                | 41,87    | -87,62    |          |            |             | cohort | 1           |
| Sharma M <sup>85</sup>                   | 2004    | 51        | 3443      | Detroit                | 42,33    | -83,04    | 100,0    | 64,6       | 42,6        | cohort | 0           |
| Steingrimssson S <sup>86</sup>           | 2008    | 41        | 1650      | Reykjavik, Island      | 64,13    | -21,93    | 75,0     |            |             | cohort | 1           |
| Strecker T <sup>87</sup>                 | 2007    | 63        | 3016      | Erlangen Nuremberg     | 49,50    | 11,04     | 65,6     | 66,6       | 29,0        | cohort | 0           |
| Ståhle E <sup>88</sup>                   | 1997    | 168       | 9987      | Uppsala, Sweden        | 59,85    | 17,63     | 75,2     | 64,8       | 25,3        | cohort | 0           |
| Sutherland RD <sup>89</sup>              | 1977    | 13        | 904       | Amarillos, Texas       | 35,21    | -101,70   |          |            |             | cohort | 1           |
| Szabó Z <sup>90</sup>                    | 2002    | 57        | 2779      | Linköping, Sweden      | 58,41    | 16,52     | 100,0    | 65,7       | 20,3        | cohort | 1           |
| Tang GH <sup>92</sup>                    | 2004    | 232       | 30102     | Toronto, Canada        | 43,65    | -74,39    | 66,0     |            | 27,4        | cohort | 0           |
| Thurer RJ <sup>93</sup>                  | 1974    | 14        | 645       | Miami                  | 25,78    | -80,20    |          |            |             | cohort | 1           |
| Tiveron MG <sup>94</sup>                 | 2012    | 35        | 2768      | Sao Paulo, Brazil      | 23,35    | -46,63    |          | 59,9       | 35,3        | cohort | 0           |
| Toumpolis1 IK <sup>91</sup>              | 2005    | 36        | 3760      | New York               | 40,71    | -74,00    | 100,0    |            | 31,0        | cohort | 1           |
| Toumpolis2 IK <sup>95</sup>              | 2005    | 40        | 3750      | New York               | 40,71    | -74,00    | 100,0    | 64,1       | 30,9        | cohort | 1           |
| Trick WE <sup>96</sup>                   | 2000    | 30        | 1796      | Madison, Wisconsin     | 43,07    | -89,40    | 100,0    | 65,0       |             | cohort | 0           |
| Upton A <sup>97</sup>                    | 2005    | 60        | 5176      | Auckland, New Zealand  | 36,84    | 174,76    | 100,0    | 64,2       | 75,0        | cohort | 0           |
| Walkes JC <sup>98</sup>                  | 2002    | 25        | 1069      | Houston, Texas         | 29,76    | -95,36    | 100,0    | 60,6       | 1,0         | cohort | 0           |
| Wang FD <sup>99</sup>                    | 2000    | 17        | 620       | Taipe, Taiwan          | 25,09    | 121,55    | 100,0    | 67,9       | 9,5         | cohort | 1           |
| Wilson SJ <sup>100</sup>                 | 2003    | 129       | 5128      | Durham, North Carolina | 35,99    | -78,89    |          |            |             | cohort | 1           |
| Wouters R <sup>101</sup>                 | 1994    | 23        | 1368      | Aalst, Belgium         | 50,93    | 4,04      | 100,0    | 63,2       | 23,9        | cohort | 1           |
| Zacharias A <sup>102</sup>               | 1996    | 21        | 2317      | Toledo, Ohio           | 41,66    | -83,57    | 82,2     | 62,0       | 31,7        | cohort | 0           |

**Abbreviations:** Pubyear: Publication year, Cases: incident cases of mediastinitis in the 30 days after operation, Total: total number of operated patients in the cohort, Place: Place of the study town and country, Latitude: latitude of study place, Longitude: Longitude of study place, CABG: frequency of Coronary Aorto Bypass Surgery, Age: Mean age of the patients in the cohort, Females: frequency of female patients, Prospective: Presence of prospective design 1=Yes 0=No.
